# Supplementary material for: Identification of a Biosynthetic Gene Cluster Responsible for the Production of a New Pyrrolopyrimidine Natural Product—Huimycin
Source: PubMed Central journal article supplement (PMC7439116; doi:10.3390/biom10071074), 2020-07-18
Supplement: biomolecules-10-01074-s001.pdf [file biomolecules-10-01074-s001.pdf]

*Supplementary Information*

# Identification of a Biosynthetic Gene Cluster Responsible for the Production of a New Pyrrolopyrimidine Natural Product—Huimycin

Hui Shuai <sup>1</sup>, Maksym Myronovskiy <sup>1</sup>, Suvd Nadmid <sup>1,2</sup> and Andriy Luzhetskyy <sup>1,3,\*</sup>

<sup>1</sup> Pharmazeutische Biotechnologie, Universität des Saarlandes, 66123 Saarbrücken, Germany; hui.shuai@uni-saarland.de (H.S.); maksym.myronovskiy@uni-saarland.de (M.M.)

<sup>2</sup> School of Pharmacy, Mongolian National University of Medical Sciences, S. Zorig street, 14210 Ulaanbaatar, Mongolia; suvdn@yahoo.com (S.N.)

<sup>3</sup> Helmholtz-Institut für Pharmazeutische Forschung Saarland, 66123 Saarbrücken, Germany

\* Correspondence: a.luzhetskyy@mx.uni-saarland.de; Tel.: +49-0681-70223

Received: 21 June 2020; Accepted: 16 July 2020; Published: 12 August 2020

Figures

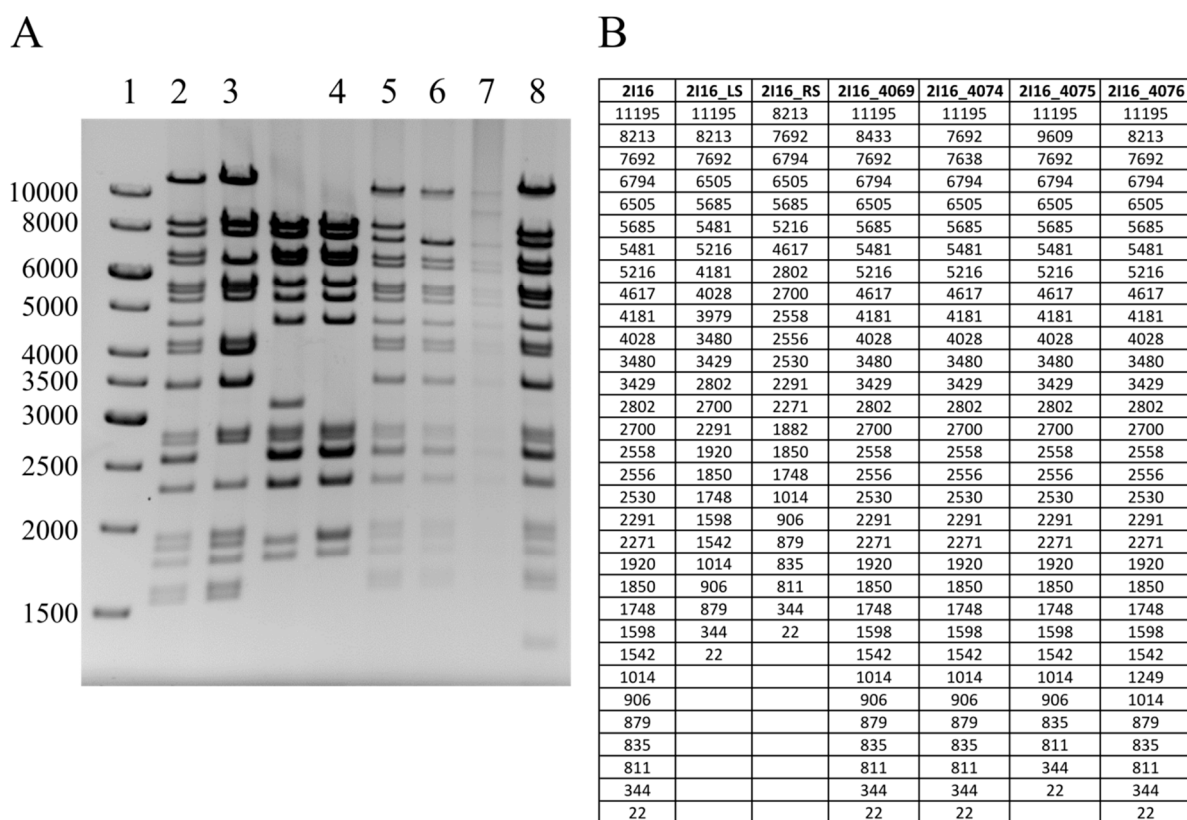

**Figure S1.** Restriction mapping of the BAC 2I16 and its derivatives with gene deletions. **(A)** Gel electrophoresis of KpnI digests of the following BACs: 2—2I16, 3—2I16\_LS, 4—2I16\_RS, 5—2I16\_4069, 6—2I16\_4074, 7—2I16\_4075, 8—2I16\_4076, 1—DNA ladder. Size of individual fragments in base pairs is shown. **(B)** The expected length of DNA fragments in base pairs obtained after KpnI digestion of the following BACs: 2I16, 2I16\_LS, 2I16\_RS, 2I16\_4069, 2I16\_4074, 2I16\_4075, and 2I16\_4076.

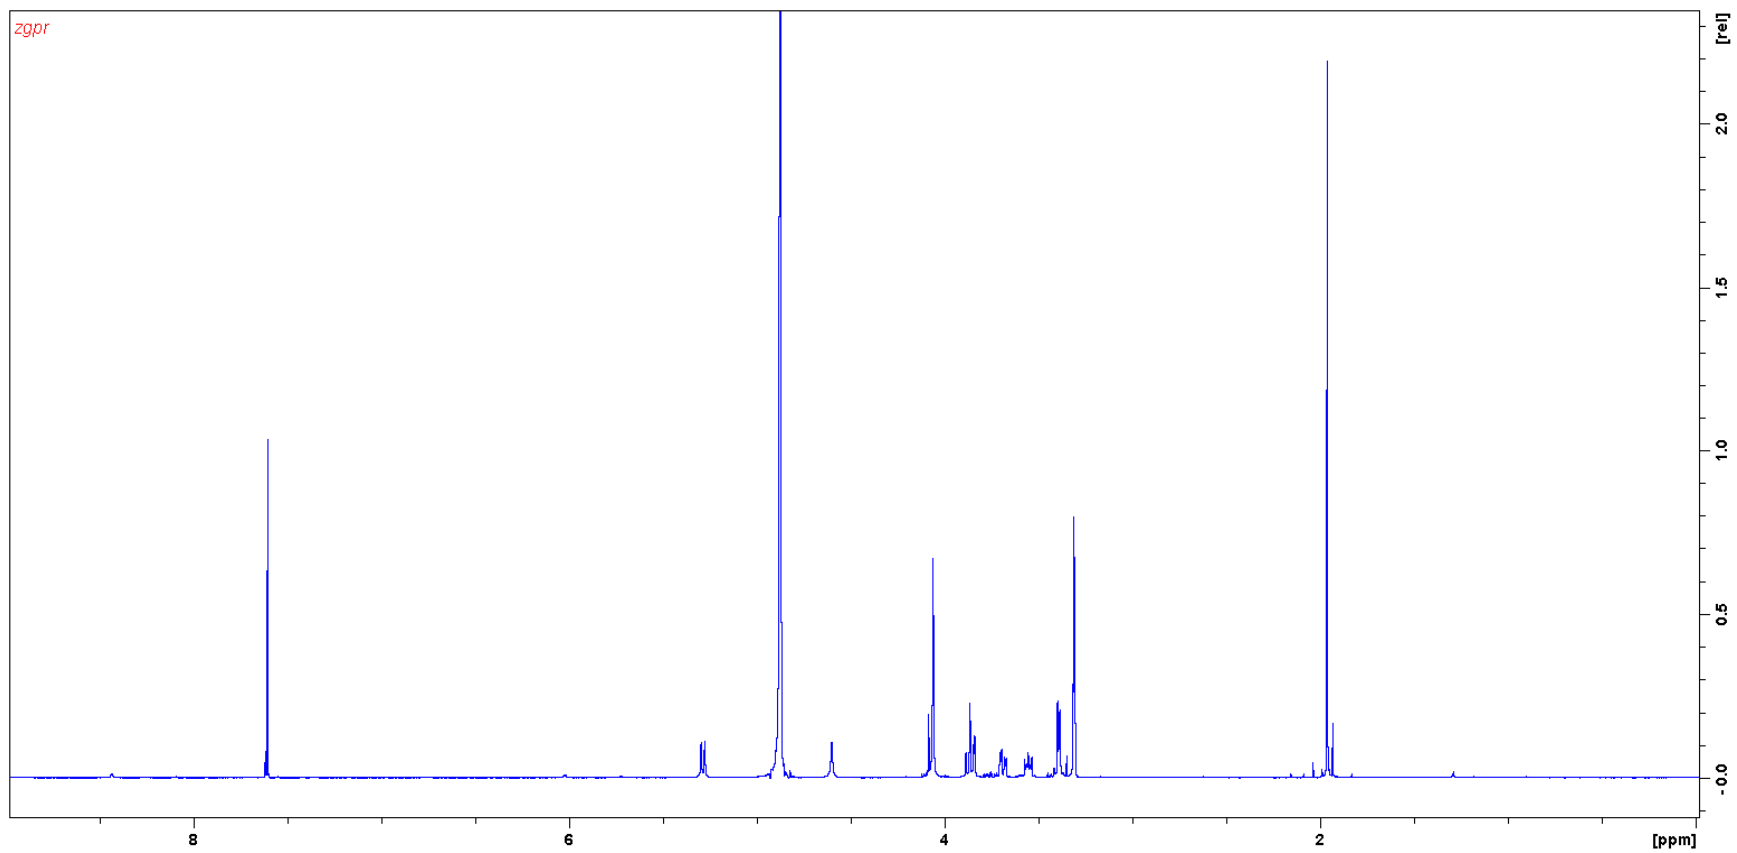

1

2

3

Figure S2. <sup>1</sup>H NMR (500 MHz, MeOD<sub>4</sub>) spectrum of huimycin 1.

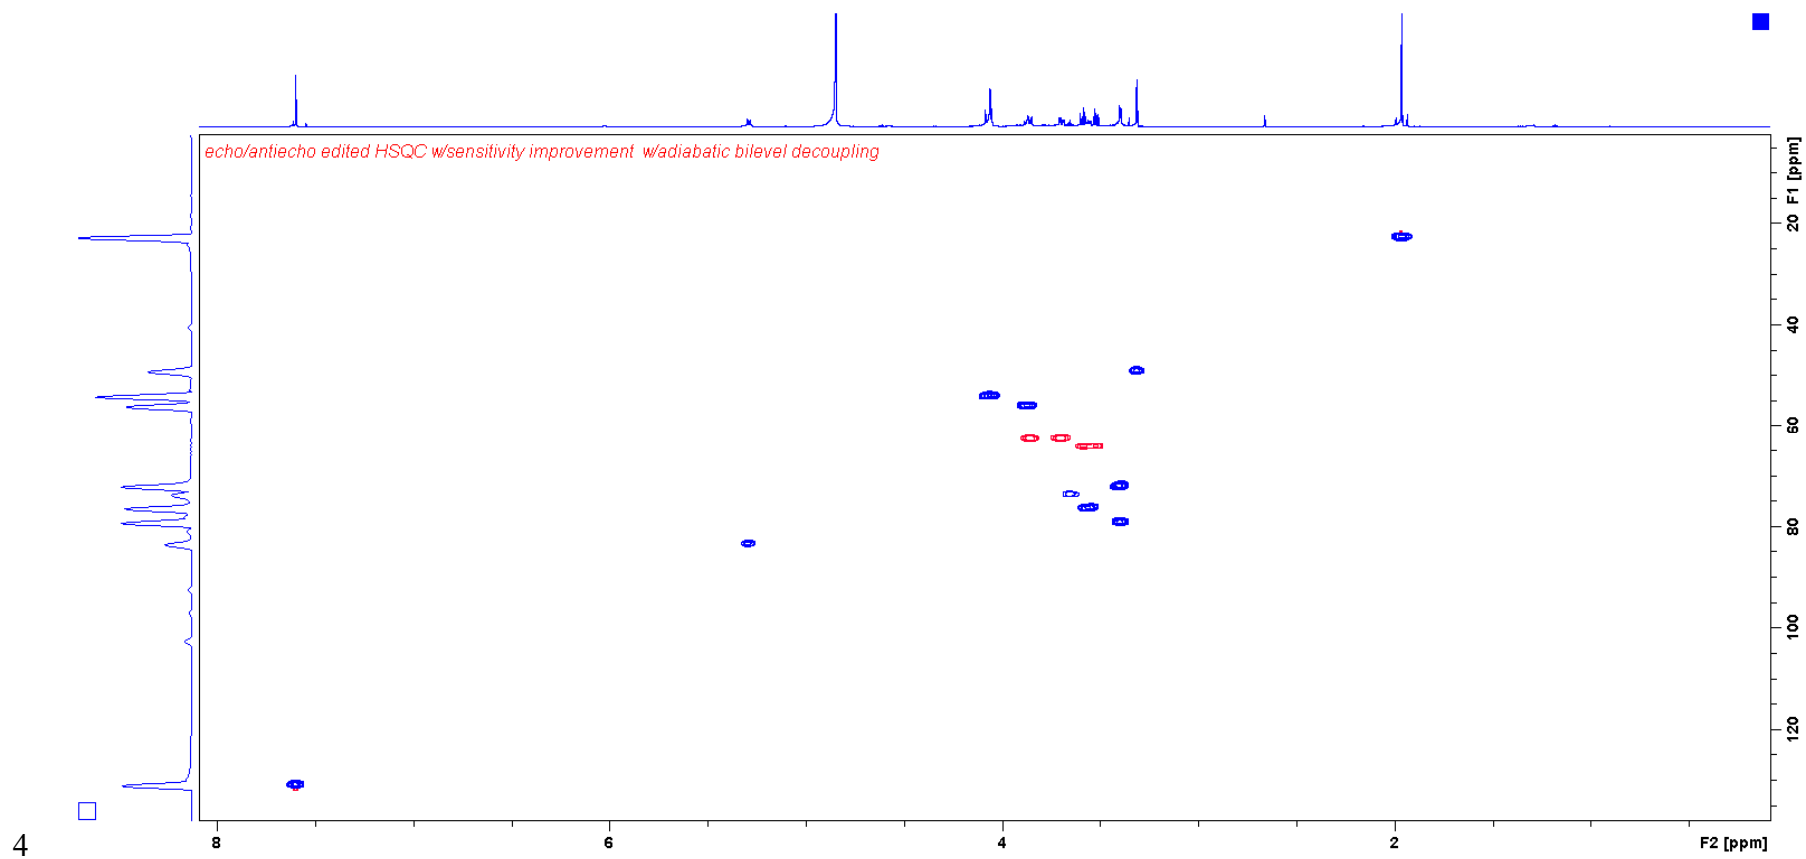

Figure S3. HSQC (500 MHz, MeOD<sub>4</sub>) spectrum of huimycin 1.

4

5

6

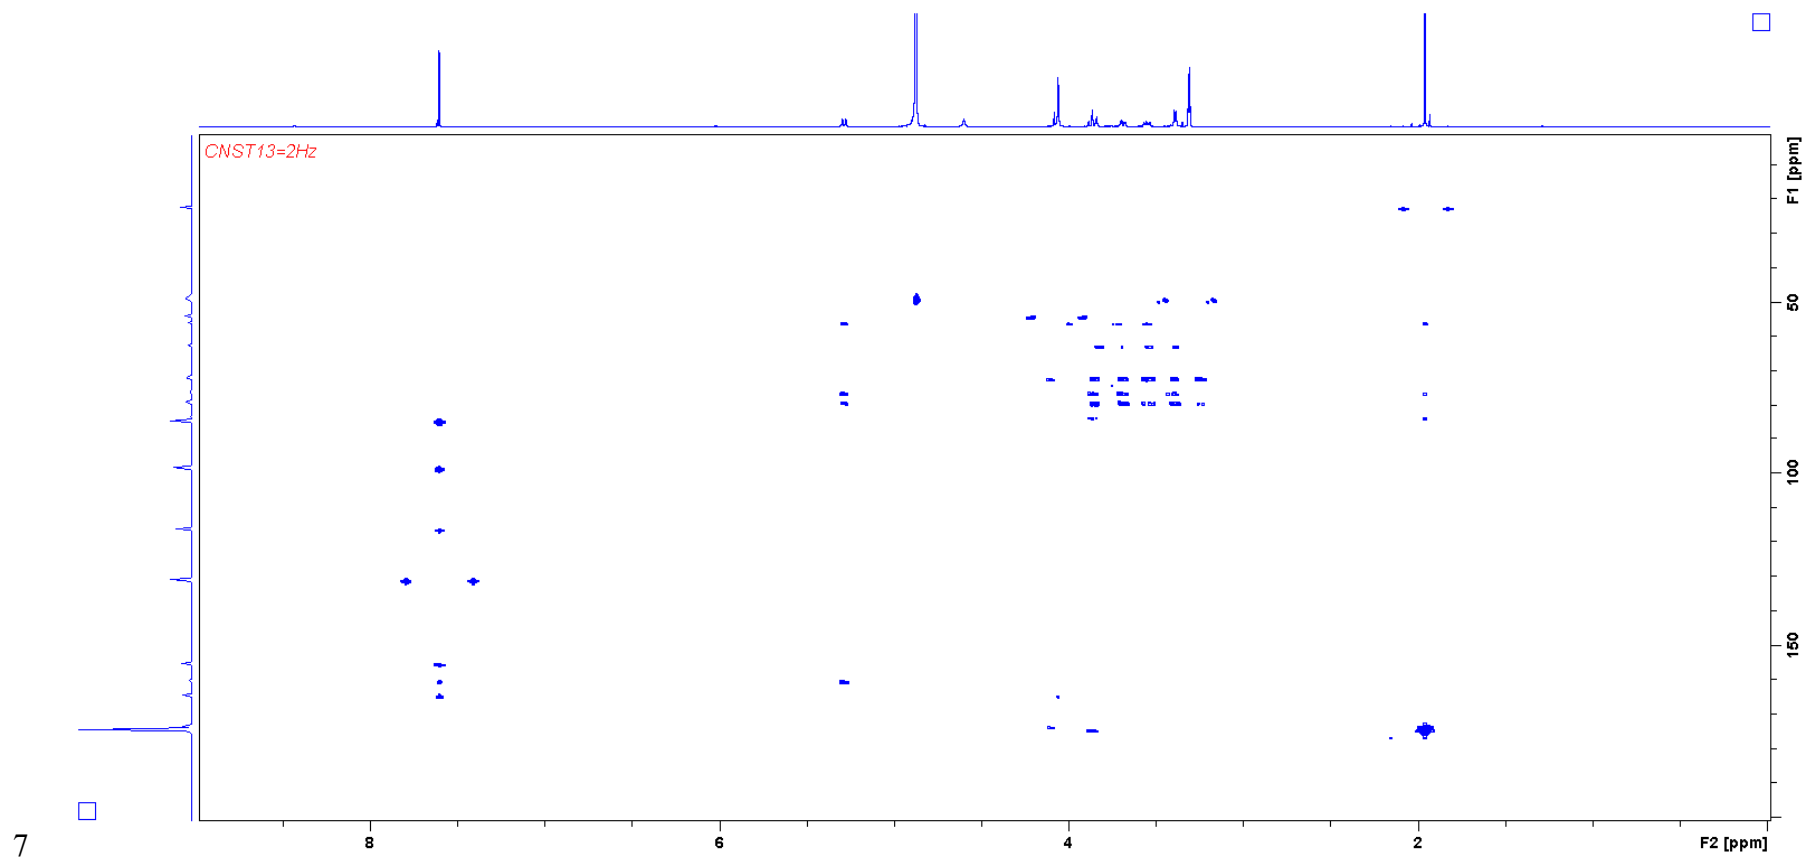

7

8

Figure S4. HMBC (500 MHz, MeOD<sub>4</sub>) spectrum (CNST 13=2 Hz) of huimycin 1.

9

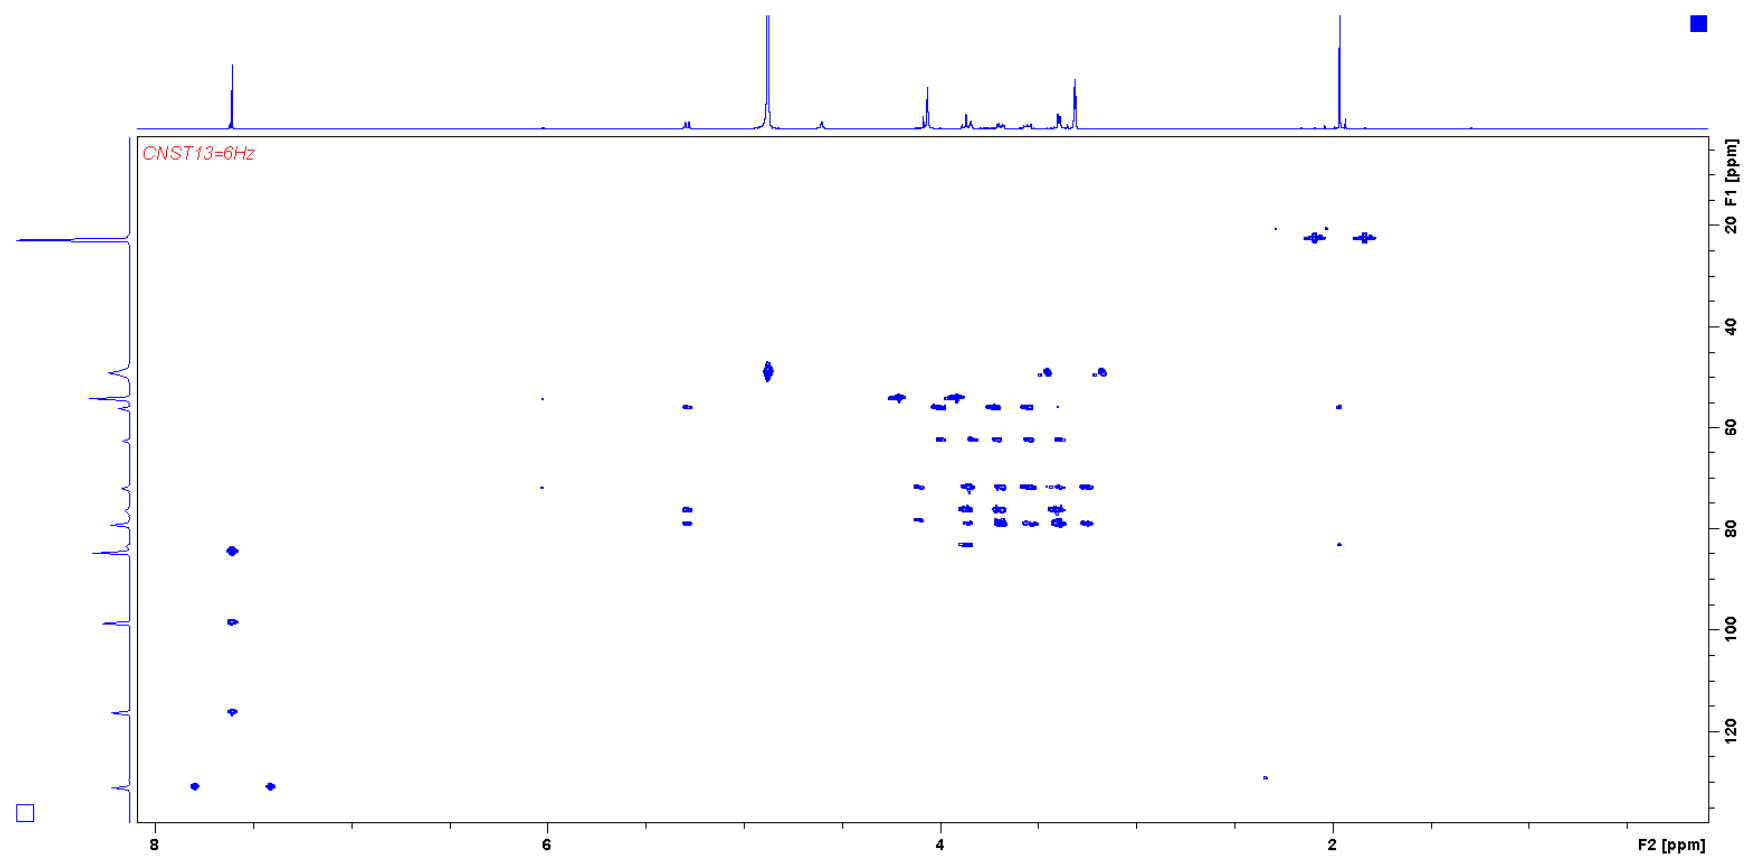

10

11

Figure S5. HMBC (500 MHz, MeOD<sub>4</sub>) spectrum (CNST 13=6 Hz) of huimycin 1.

12

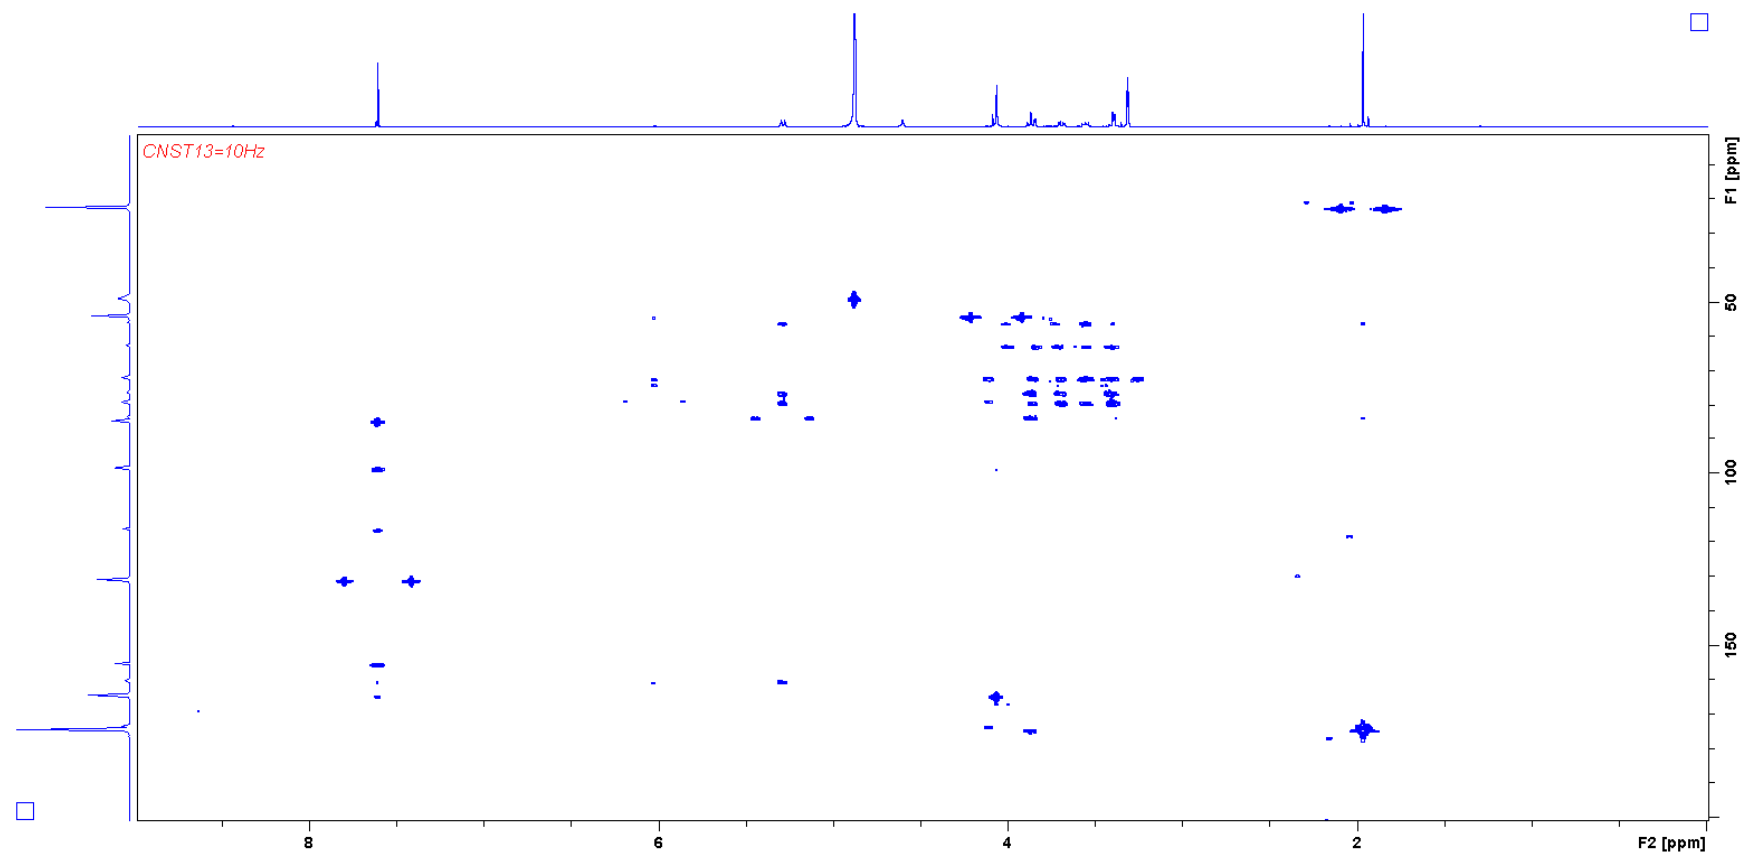

13

14

**Figure S6.** HMBC (500 MHz, MeOD<sub>4</sub>) spectrum (CNST 13=10 Hz) of huimycin 1.

15

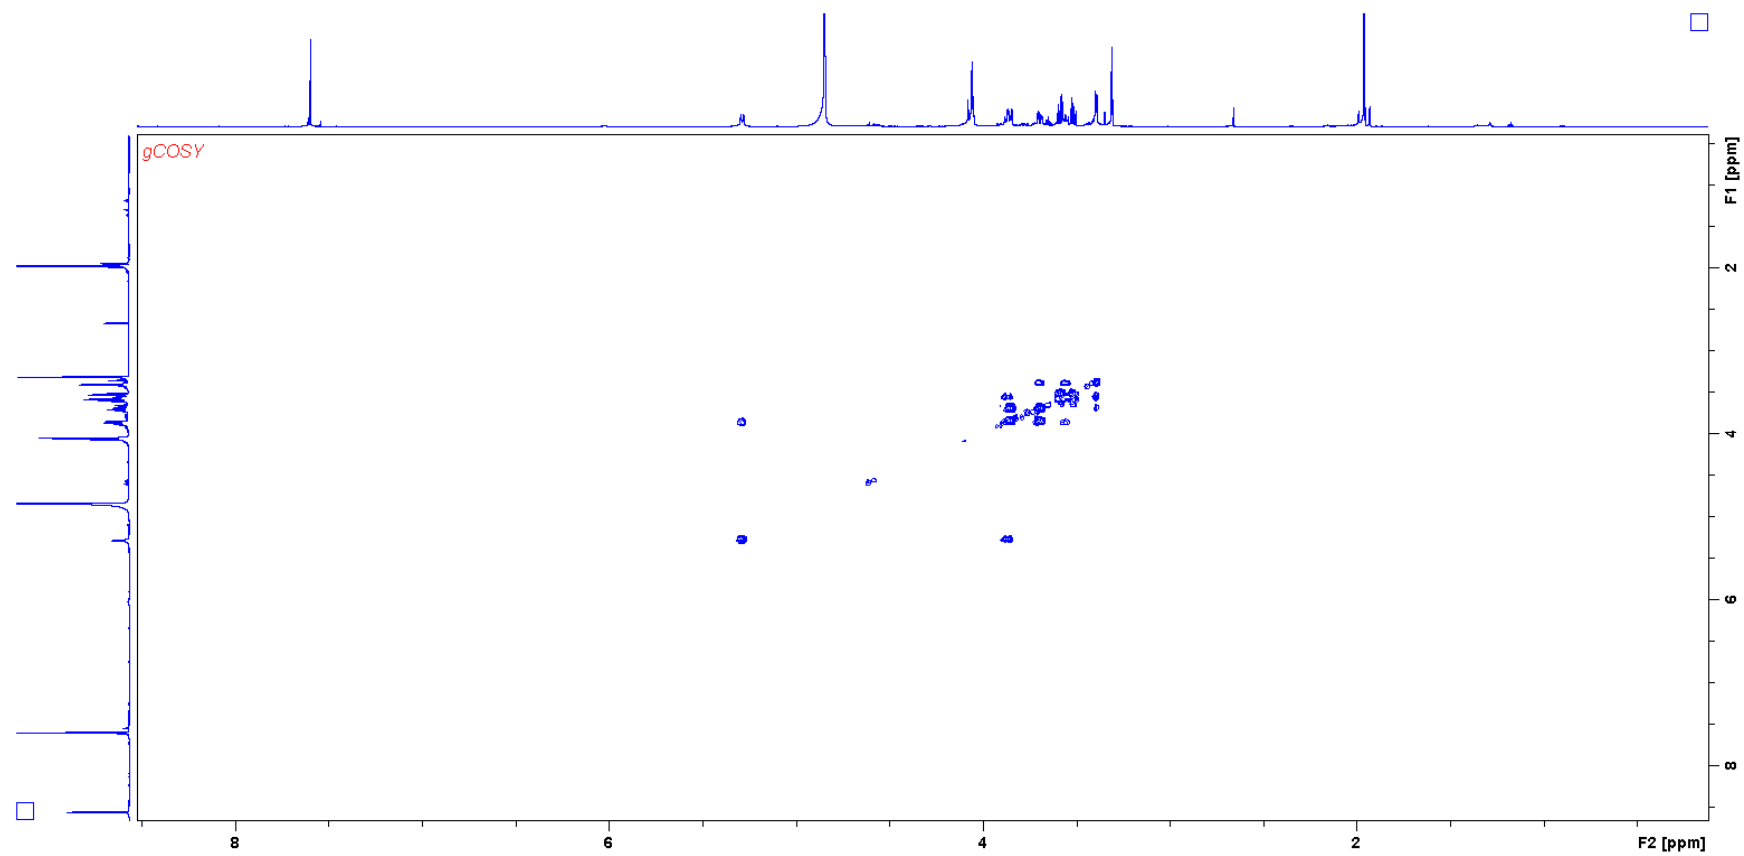

16

17

Figure S7.  $^1\text{H}$ - $^1\text{H}$  COSY (500 MHz,  $\text{MeOD}_4$ ) spectrum of huimycin 1.

18



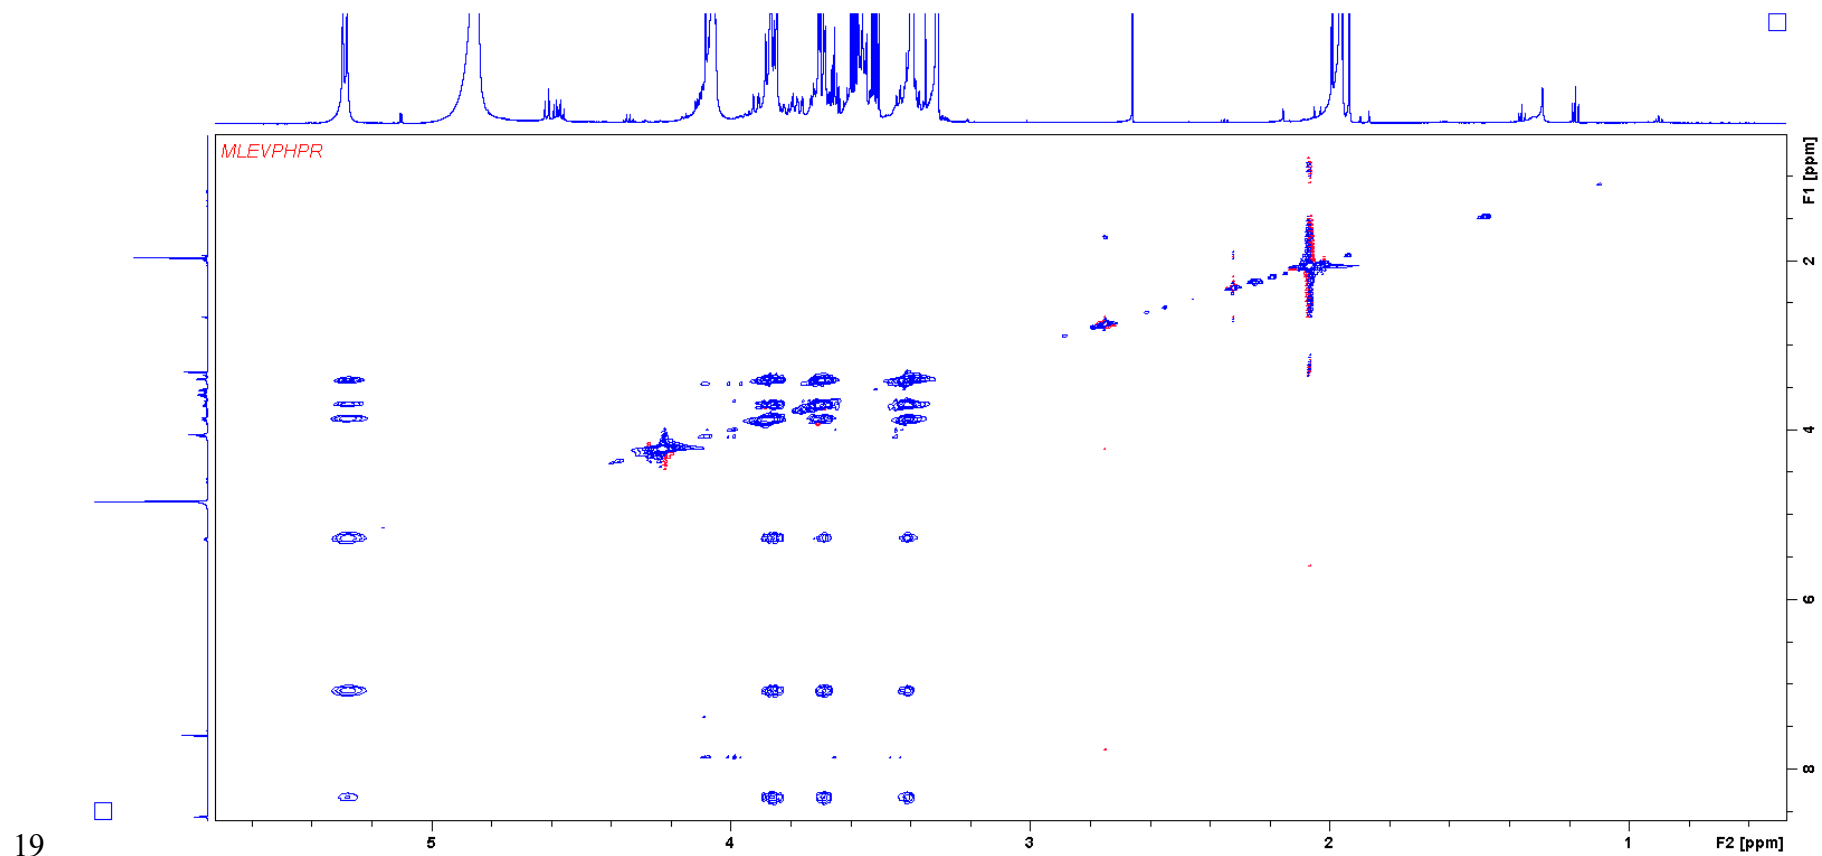

19

20

Figure S8. TOSCY (500 MHz, MeOD<sub>4</sub>) spectrum of huimycin 1.

21

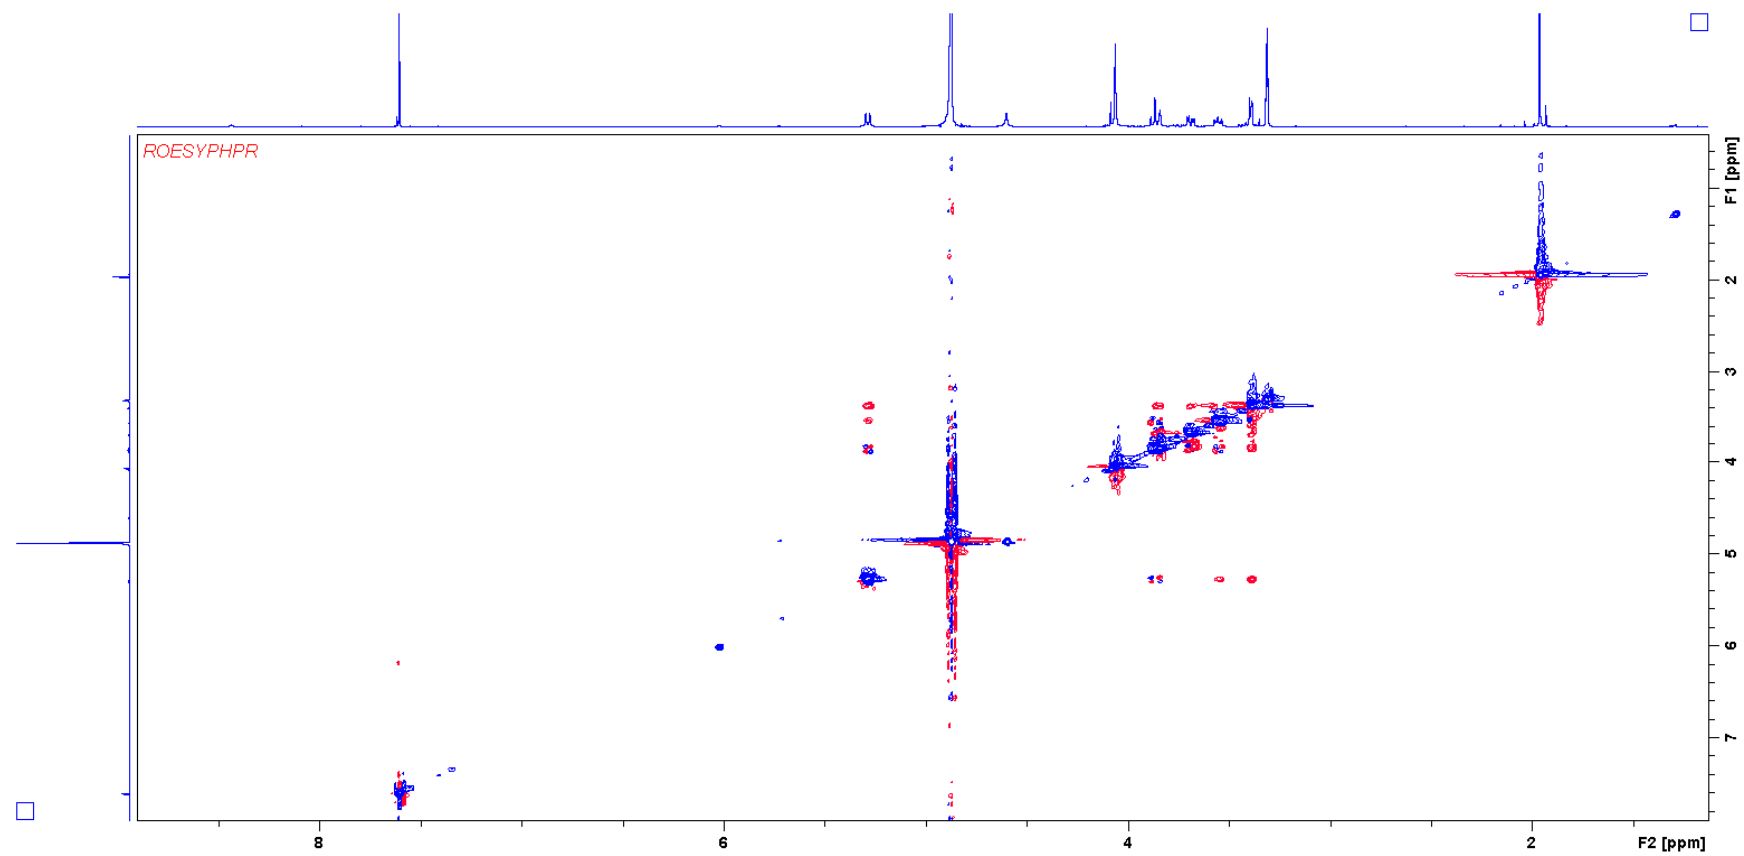

22

23

Figure S9. ROESY (500 MHz, MeOD<sub>4</sub>) spectrum of huimycin 1.

## Tables

Table S1. Bacterial strains used in this work.

| Strain                                 | Description                                                                        | Reference or source |
|----------------------------------------|------------------------------------------------------------------------------------|---------------------|
| <i>Kutzneria albida</i> DSM 43870      | The wild type strain; the source of the huimycin cluster                           | [1]                 |
| <i>Streptomyces albus</i> Del14        | The heterologous host strain; cluster-free derivative of the <i>S. albus</i> J1074 | [2]                 |
| <i>S. albus</i> 2I16                   | Derivative of <i>S. albus</i> Del14 harboring the 2I16 BAC                         | This work           |
| <i>S. albus</i> 2I16_LS                | Derivative of <i>S. albus</i> Del14 harboring the 2I16_LS BAC                      | This work           |
| <i>S. albus</i> 2I16_RS                | Derivative of <i>S. albus</i> Del14 harboring the 2I16_RS BAC                      | This work           |
| <i>S. albus</i> 2I16_4069              | Derivative of <i>S. albus</i> Del14 harboring the 2I16_4069 BAC                    | This work           |
| <i>S. albus</i> 2I16_4074              | Derivative of <i>S. albus</i> Del14 harboring the 2I16_4074 BAC                    | This work           |
| <i>S. albus</i> 2I16_4075              | Derivative of <i>S. albus</i> Del14 harboring the 2I16_4075 BAC                    | This work           |
| <i>S. albus</i> 2I16_4076              | Derivative of <i>S. albus</i> Del14 harboring the 2I16_4076 BAC                    | This work           |
| <i>Escherichia coli</i> ET12567 pUB307 | Donor strain for intergeneric conjugation                                          | [3]                 |
| <i>Escherichia coli</i> DH10 $\beta$   | General cloning strain                                                             | [4]                 |

**Table S2.** Plasmids and BACs used in this work.

| <b>BAC</b> | <b>Description</b>                                                                                  | <b>Reference or source</b> |
|------------|-----------------------------------------------------------------------------------------------------|----------------------------|
| 2I16       | The BAC containing 95 kb chromosomal fragment of <i>K. albidia</i> ; contains huimycin gene cluster | [1]                        |
| 2I16_LS    | The derivative of 2I16 with the deletion of 20 kb DNA fragment upstream the huiA gene               | This work                  |
| 2I16_RS    | The derivative of 2I16 with the deletion of 36 kb DNA fragment downstream the KALB_4076 gene        | This work                  |
| 2I16_4069  | The derivative of 2I16 with the deletion of KALB_4069 ( <i>huiC</i> ) gene                          | This work                  |
| 2I16_4074  | The derivative of 2I16 with the deletion of KALB_4074 gene                                          | This work                  |
| 2I16_4075  | The derivative of 2I16 with the deletion of KALB_4075 gene                                          | This work                  |
| 2I16_4076  | The derivative of 2I16 with the deletion of KALB_4076 gene                                          | This work                  |
| pACS-hyg   | The plasmid containing hygromycin resistance gene                                                   | [5]                        |
| pUC19      | General cloning vector                                                                              | Thermo Scientific          |

Table S3. Primers used in this study.

| Primer   | Sequence                                                                            |
|----------|-------------------------------------------------------------------------------------|
| LS_F     | CGTTCCGTCTCTGTCACGAAGTGCGCCAGTTGGTAGAGGGCCGCTGCGCAATACTT<br>GACATATCACTGT           |
| LS_R     | TACGAGCCCAGCTCACTGAGGCTGGTCTCGAGTGTGTTGGGCGCGTCAGTTCTAGAT<br>CAGGCGCCGGGGCGGTGT     |
| RS_F     | ACGCAGAGGCAGCCCCGACGCGCCAGCCCACGGTCGTAGCAAGGAGCCAGGCGTCA<br>GGTGGCACTTTTCG          |
| RS_R     | TGATGCAGCAGGGCACTGGGCAGGACGTA ACTGGTTGACCGCAGGATCGCGATATC<br>TTACCAATGCTTAATCAGTG   |
| 4069_F   | ATGAGCATGGGAACATCCCGGACAGCGGTGACTCCTCTCGACGCCGAGGGTTTAAA<br>CCGTCAGGTGGCACTTTTCG    |
| 4069_R   | CACAGCACCGAAGCCGTCGACGTGTGGGGGCGGGCGATCAGGACGGCGCCGTTTAA<br>ACTTACCAATGCTTAATCAGTG  |
| 4074_F   | ATGATCGTTCTCGGACTGATCGGACGGCCCGACGTCCCGCTCTGCCATGGTTTAAAC<br>CGTCAGGTGGCACTTTTCG    |
| 4074_R   | CAGGAGCGGCTCACCGCGTACGGCGGCATGACCAGCAGGTGCGACGTCCGGGTTTAA<br>ACTTACCAATGCTTAATCAGTG |
| 4075_F   | ATGGGGAAGAGCTACGAGCGGATAGACGGCAGACTGCGTGCCTTCATCGGTTTAAA<br>CCGTCAGGTGGCACTTTTCG    |
| 4075_R   | TATTCAGCGCGGGAAGCGGTGGCAGCGGCAACGGCAACCCCGGCAGGCCGTTTAA<br>ACTTACCAATGCTTAATCAGTG   |
| 4076_F   | ATGGTCGACAACATGCGGAGGTGTGATGAGATACCCGATTCCACGATTGGTTTAAAC<br>CGTCAGGTGGCACTTTTCG    |
| 4076_R   | CAGGTCGGTGAGGTCGCTGTGGGGATTTCCGGCGATACGCCAAACGCCGATGTTTAAA<br>CTTACCAATGCTTAATCAGTG |
| LS_chF   | GTTCTCCCTTCCACCAGCC                                                                 |
| LS_chR   | TGTTCTTCAGGACGCGGAC                                                                 |
| RS_chF   | TGATTTTCGTCGCGGTGGAA                                                                |
| RS_chR   | GCCGCATACGACAGGGAAT                                                                 |
| 4069_chF | AACCTGCGGAACCTGCTAC                                                                 |
| 4069_chR | AACTTGCTGAGTCCCGCTC                                                                 |
| 4074_chF | CGAACAGTTGTGGTGTGCG                                                                 |
| 4074_chR | GGTCTTGACAATTGCTCCGG                                                                |
| 4075_chF | CGATCCCCTTGGCATGTGA                                                                 |
| 4075_chR | CGCTGCTGGATGAGATCGT                                                                 |
| 4076_chF | AACCAACAAGGGGCTGTCC                                                                 |
| 4076_chR | AGTTCACCGCGACGAAAT                                                                  |

## References

1. Rebets, Y.; Tokovenko, B.; Lushchik, I.; Rückert, C.; Zaburannyi, N.; Bechthold, A.; Kalinowski, J.; Luzhetskyy, A. Complete genome sequence of producer of the glycopeptide antibiotic Aculeximycin *Kutzneria albida* DSM 43870T, a representative of minor genus of *Pseudonocardiaceae*. *BMC Genomics* **2014**, *15*, 885, doi:10.1186/1471-2164-15-885.
2. Myronovskyi, M.; Rosenkränzer, B.; Nadmid, S.; Pujic, P.; Normand, P.; Luzhetskyy, A. Generation of a cluster-free *Streptomyces albus* chassis strains for improved heterologous expression of secondary metabolite clusters. *Metab. Eng.* **2018**, *49*, 316–324, doi:10.1016/j.ymben.2018.09.004.
3. Flett, F.; Mersinias, V.; Smith, C.P. High efficiency intergeneric conjugal transfer of plasmid DNA from *Escherichia coli* to methyl DNA-restricting streptomycetes. *FEMS Microbiol. Lett.* **1997**, *155*, 223–229, doi:10.1111/j.1574-6968.1997.tb13882.x.
4. Grant, S.G.; Jessee, J.; Bloom, F.R.; Hanahan, D. Differential plasmid rescue from transgenic mouse DNAs into *Escherichia coli* methylation-restriction mutants. *Proc. Natl. Acad. Sci. U.S.A.* **1990**, *87*, 4645–4649, doi:10.1073/pnas.87.12.4645.
5. Myronovskyi, M.; Brötz, E.; Rosenkränzer, B.; Manderscheid, N.; Tokovenko, B.; Rebets, Y.; Luzhetskyy, A. Generation of new compounds through unbalanced transcription of landomycin A cluster. *Appl. Microbiol. Biotechnol.* **2016**, *100*, 9175–9186, doi:10.1007/s00253-016-7721-3.

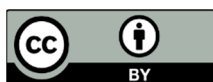

© 2020 by the authors. Licensee MDPI, Basel, Switzerland. This article is an open access article distributed under the terms and conditions of the Creative Commons Attribution (CC BY) license (<http://creativecommons.org/licenses/by/4.0/>).
